# Supplementary material for: Single-Cell Optogenetic Control of Calcium Signaling with a High-Density Micro-LED Array
Source: PubMed Central journal article supplement (PMC6889635; doi:10.1016/j.isci.2019.10.024), 2019-10-19
Supplement: mmc1.pdf [file mmc1.pdf]

**ISCI, Volume 21**

**Supplemental Information**

**Single-Cell Optogenetic Control of Calcium**

**Signaling with a High-Density Micro-LED Array**

**Dacheng Mao, Ningwei Li, Zheshun Xiong, Yubing Sun, and Guangyu Xu**

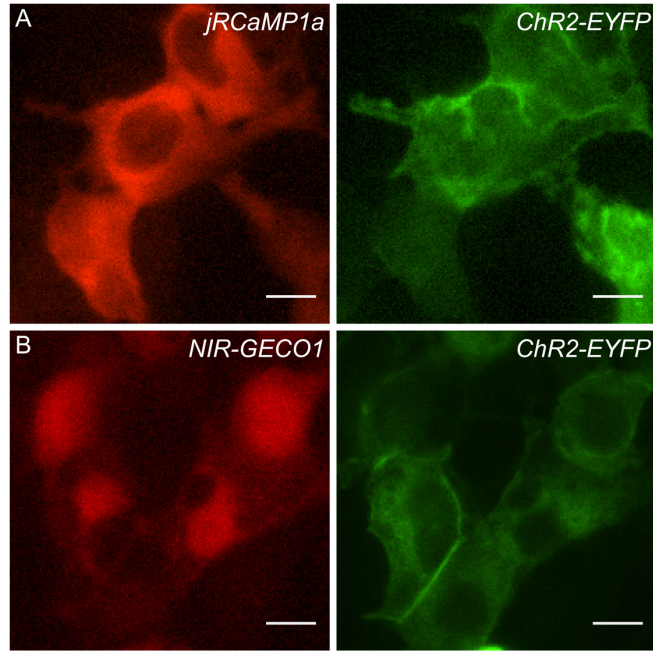

**Figure S1. Co-expression of *ChR2* with *jRCaMP1a* or *NIR-GECO1* in HEK 293 cells (related to Figure 1).**

Example fluorescence images of *ChR2-jRCaMP1a* (A) and *ChR2-NIR-GECO1* (B) co-expressed cells, pseudo-colored with light red for *jRCaMP1a*, deep red for *NIR-GECO1* and green for *ChR2-EYFP*. Scale bar, 10  $\mu\text{m}$ .

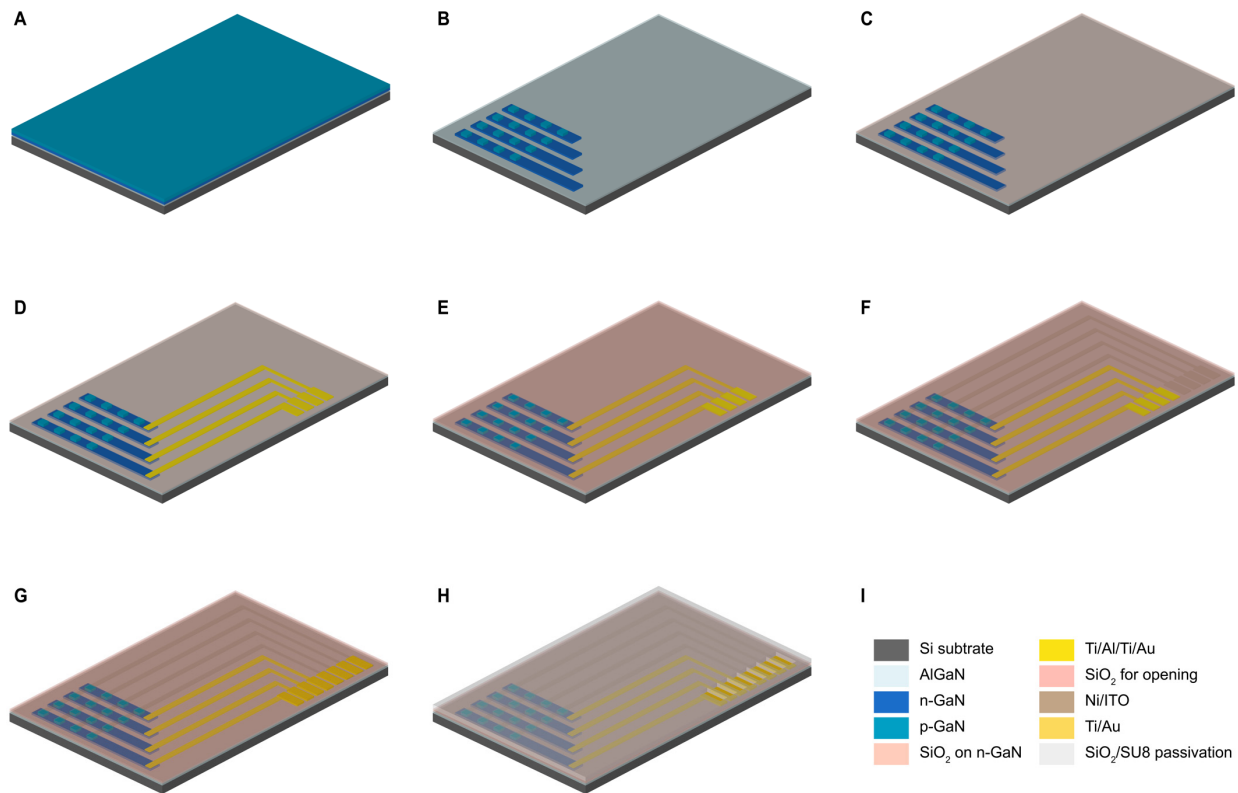

**Figure S2. Fabrication flow of the micro-LED array (related to Figure 1).**

On an epitaxial GaN-on-Si wafer (A), LED pixels were defined by two RIE steps (B). Four n-GaN islands were passivated by a PECVD based SiO<sub>2</sub> layer (PECVD-SiO<sub>2</sub>) (C), followed by evaporating Ti/Al/Ti/Au layers as the n-contact (D). The array was then passivated by a second PECVD-SiO<sub>2</sub> layer, followed by a RIE step to open the pixels and pad areas (E). Next, Ni/ITO (F) and Ti/Au (G) layers were made as p-contact and pad contact, respectively. The entire array was finally encapsulated by PECVD-SiO<sub>2</sub>/SU8 layers (H).

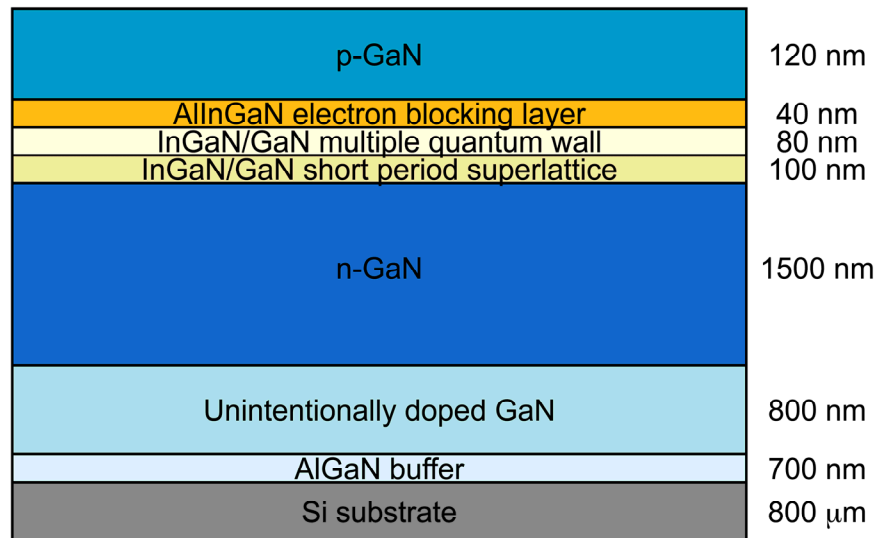

Figure S3. Cross-sectional view of a GaN-on-Si wafer (related to Figure 1).

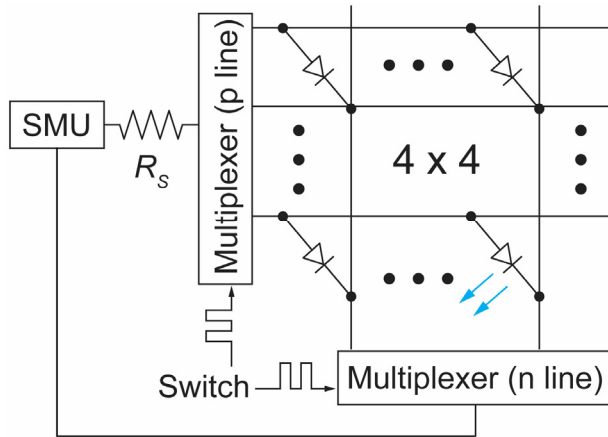

**Figure S4. Off-board multiplexing circuit to access individual pixels in a 4-by-4 micro-LED array (SMU: source-measurement unit).  $R_s$  represents the applied series resistor (related to Figure 1).**

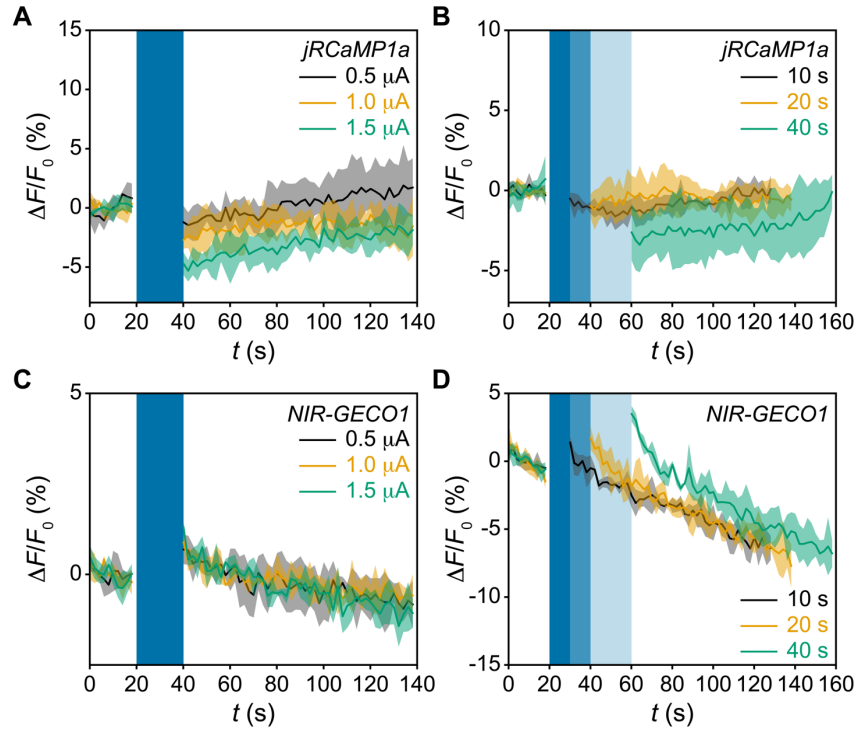

**Figure S5. Control cell responses to optogenetic stimulus offered by LEDs (related to Figure 3).**

(A)  $\Delta F/F_0$  traces from a *jRCaMP1a* control cell with  $T_{LED} = 20$  s and  $I_{LED}$  ranging from 0.5 to 1.5  $\mu\text{A}$ . (B)  $\Delta F/F_0$  traces from a *jRCaMP1a* control cell with  $T_{LED}$  ranging from 10 to 40 s and  $I_{LED} = 1.5$   $\mu\text{A}$ . (C)  $\Delta F/F_0$  traces from a *NIR-GECO1* control cell with  $T_{LED} = 20$  s and  $I_{LED}$  ranging from 0.5 to 1.5  $\mu\text{A}$ . (D)  $\Delta F/F_0$  traces from a *NIR-GECO1* control cell with  $T_{LED}$  ranging from 10 to 40 s and  $I_{LED} = 1.5$   $\mu\text{A}$ . Blue windows represent the periods of optogenetic stimulus; solid lines represent the mean value from three consecutive recording periods; shaded areas represent  $\pm 1$  s.d.

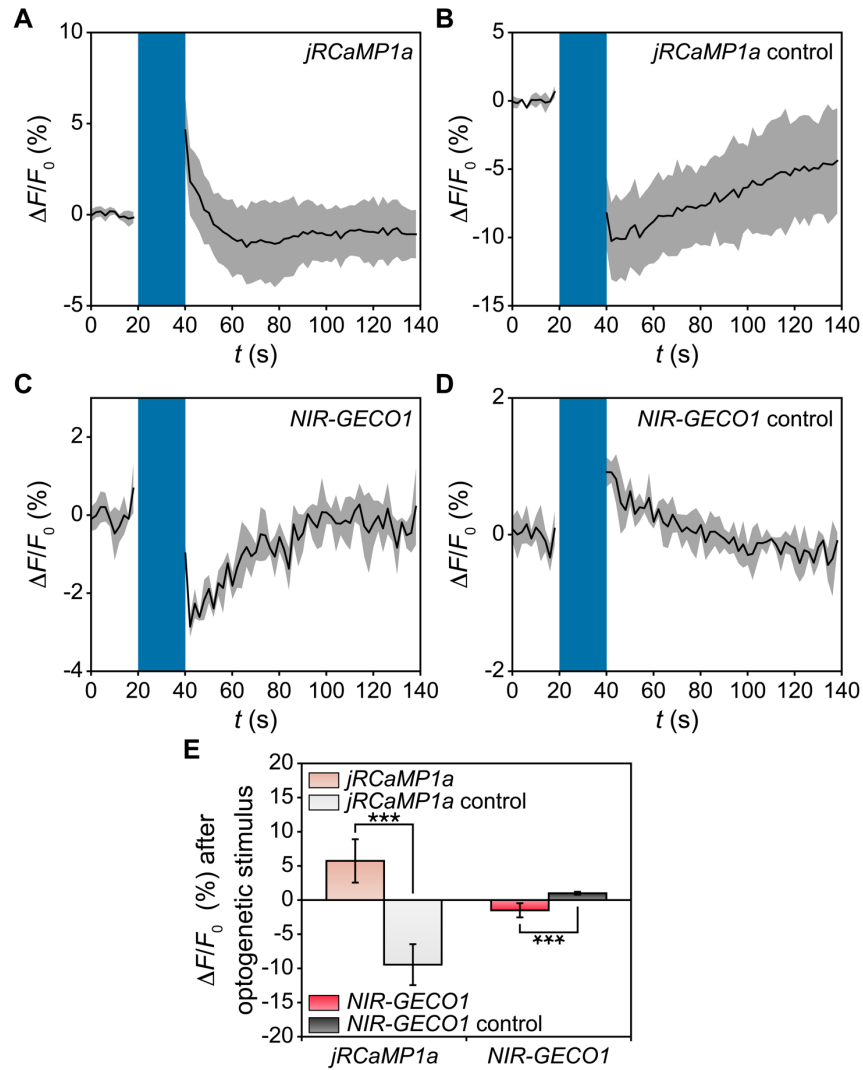

**Figure S6. Cell responses to optogenetic stimulus offered by a fluorescence microscope (related to Figure 3).**

Representative  $\Delta F/F_0$  traces with 20 s microscope-based optogenetic stimulus from a *Chr2-jRCaMP1a* co-expressed cell (A), a *jRCaMP1a* control cell (B), a *Chr2-NIR-GECO1* co-expressed cell (C), and a *NIR-GECO1* control cell (D). In A, B, C, and D, blue windows represent the periods of optogenetic stimulus; solid lines represent the mean value from three consecutive recording periods; shaded areas represent  $\pm 1$  s.d. (E) Statistical analysis of  $\Delta F/F_0$  signals. Error bars represent  $\pm 1$  s.d. ( $n = 15$  from 5 independent cells in each group, 3 recording periods from each cell); \*\*\* $P < 0.001$  based on Student's  $t$ -test.

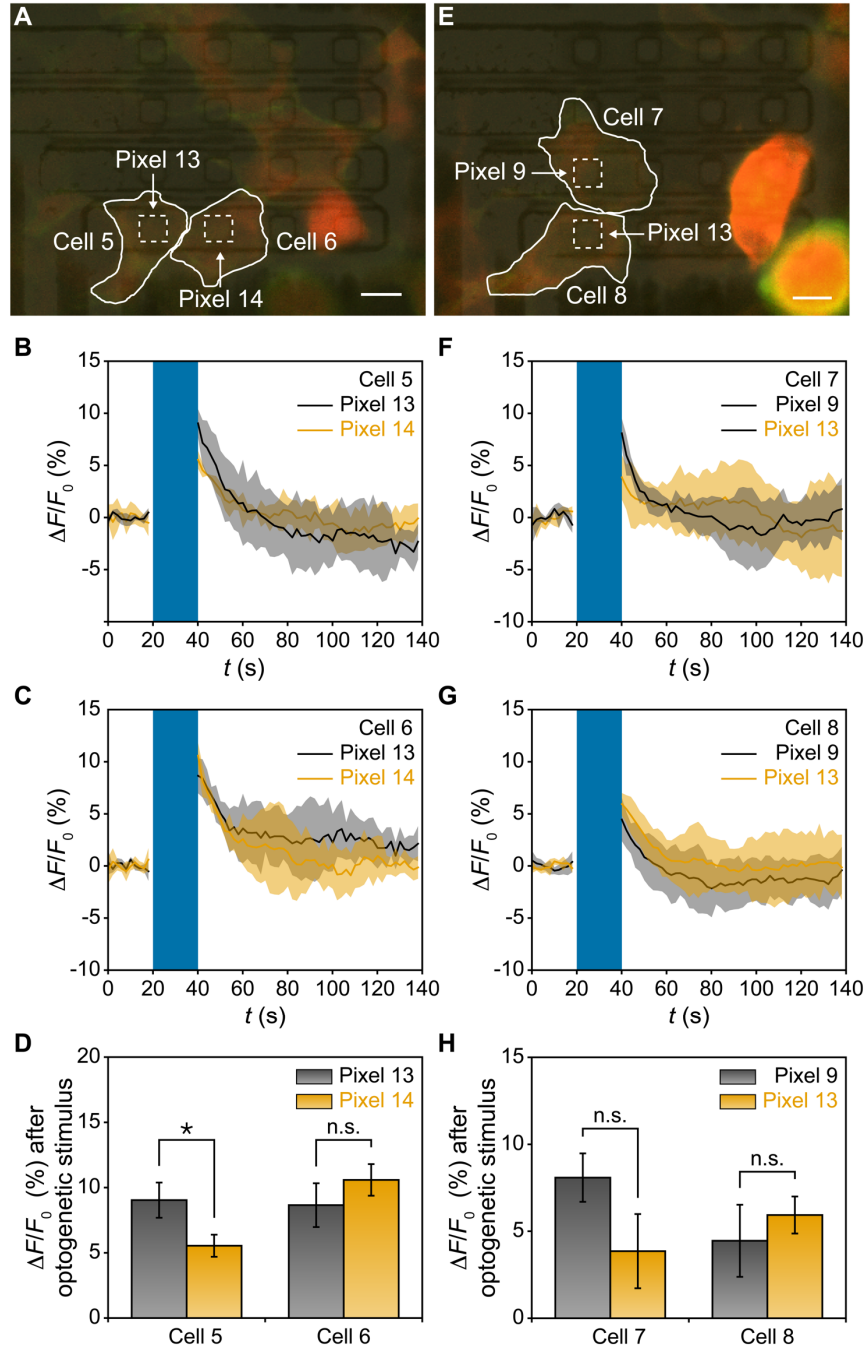

**Figure S7. Additional two experiments to evaluate the spatial resolution of the optogenetic stimulus offered by LEDs (related to Figure 4).**

(A) One pair of cells (outlined, overlapped with pixels 13 and 14) were sub-1  $\mu\text{m}$  apart. Scale bar, 10  $\mu\text{m}$ . (B)  $\Delta F/F_0$  traces from cell 5 that was stimulated by pixels 13 and 14 with  $T_{\text{LED}} = 20$  s. (C)  $\Delta F/F_0$  traces from cell 6 that was stimulated by pixels 13 and 14 with  $T_{\text{LED}} = 20$  s. (D) Statistical analysis of  $\Delta F/F_0$  signals from cell 5 and cell 6. (E) Another pair of cells (outlined, overlapped with pixels 9 and 13) were sub-1  $\mu\text{m}$  apart. Scale bar, 10  $\mu\text{m}$ . (F)  $\Delta F/F_0$  traces from cell 7 that was stimulated by pixels 9 and 13 with  $T_{\text{LED}} = 20$  s and  $P_{\text{light}} \sim 0.71$  mW/mm<sup>2</sup>. (G)  $\Delta F/F_0$  traces from cell 8 that was stimulated by pixels 9 and 13 with  $T_{\text{LED}} = 20$  s and  $P_{\text{light}} \sim 0.71$  mW/mm<sup>2</sup>. (H) Statistical analysis of  $\Delta F/F_0$  signals from cell 7 and cell 8. In B, C, F, and G,



blue windows represent the periods of optogenetic stimulus; solid lines represent the mean value from three consecutive recording periods; shaded areas represent  $\pm 1$  s.d. In D and H, error bars represent  $\pm 1$  s.d. ( $n = 3$  recording periods); \* $P < 0.05$ , n.s.  $P > 0.05$  based on Student's  $t$ -test. The  $I_{LED}$  values applied to output  $P_{light} \sim 0.71$  mW/mm<sup>2</sup> were 1.6  $\mu$ A for pixel 9, 1.0  $\mu$ A for pixel 13, and 1.1  $\mu$ A for pixel 14. These results suggest that our array cannot address individual cells that are sub-1  $\mu$ m apart.

## Transparent Methods

### 1. Array fabrication.

GaN-on-Si wafers (Enkris Semiconductor) were formed by sequentially growing a AlGaN buffer layer (700 nm), an unintentionally-doped GaN (800 nm) layer, a Si doped n-GaN layer (1500 nm), a InGaN/GaN short period superlattice layer (100 nm), a quantum well layer (80 nm), a AlInGaN electron blocking layer (40 nm), and a Mg-doped p-GaN layer (120 nm) on top of a (111) Si substrate (800  $\mu\text{m}$ ). Our LED pixels were defined by two RIE steps. A PECVD-SiO<sub>2</sub> (~200 nm) layer was first applied to passivate n-GaN islands, followed by evaporating Ti/Al/Ti/Au (10/70/10/120 nm) layers as the n-contact. The array was then passivated by a second PECVD-SiO<sub>2</sub> (~200 nm) layer, followed by a RIE step to open the pixel- and pad-areas, as well as a 10-s dip in 50:1 buffered oxide etchant to remove residual SiO<sub>2</sub> (if any). Next, exposed p-GaN areas were treated by a dilute HCl solution (10%) for 30 s to etch unintentionally oxidized, if any, GaN regions, and contacted by sputtered Ni/ITO (5/120 nm) layers. Afterwards, Ti/Au (10/200 nm) layers were deposited to create the pad contact. The entire array was then annealed at 500 °C for 5 mins in an O<sub>2</sub> atmosphere (20 sccm, 120 mtorr) to reduce the contact resistance. Finally, the array was encapsulated by PECVD-SiO<sub>2</sub> (~200 nm)/SU8 (14  $\mu\text{m}$ ) layers before the cell experiment.

### 2. Cell seeding on PDMS pieces.

PDMS pieces were prepared with a ~200  $\mu\text{m}$  thickness according to the manufacturer's recommendation. Before cell seeding, each PDMS piece was sterilized by 30-minute ultrasonication in 70% ethanol, dried with compressed air, and placed in a 48-well plate (Fisher Scientific). To improve the cell adhesion, we applied a 7-min UV-Ozone treatment (MODEL30, Jelight) to activate the PDMS pieces, coated them with fibronectin (50  $\mu\text{g}/\text{ml}$  in DI water, ThermoFisher) for 1 hr at room temperature, and applied 3 times of 1X phosphate buffered saline (ThermoFisher) wash.

After these steps, HEK 293 cells (ATCC CRL-3216) were passaged by 0.25% trypsin (ThermoFisher) and seeded onto the PDMS pieces at a density of 20,000 cells/cm<sup>2</sup>. Cells were cultured in 90% Dulbecco's Modified Eagle Medium (high glucose, no glutamine) (ThermoFisher), supplemented by 10% Fetal Bovine Serum (Sigma-Aldrich), 1% penicillin/streptomycin (ThermoFisher), 1% GlutaMAX (100X, ThermoFisher) and 1% Sodium Pyruvate (100 mM, ThermoFisher), and kept in a humidified incubator (ThermoFisher) at 37 °C with 5% CO<sub>2</sub>.

### 3. Plasmid purification and cell transfection.

The plasmids encoding *ChR2*, *jRCaMP1a*, and *NIR-GECO1* we used are *pcDNA3.1/hChR2(H134R)-EYFP* (Addgene #20940), *pGP-CMV-NES-jRCaMP1a* (Addgene #61562) and *pDuEx2-NIR-GECO1* (Addgene #113680), respectively. Bacteria containing these plasmids were first cultured in LB Agar plates (added with kanamycin or ampicillin) at 37 °C overnight. Afterwards, single colonies were picked and cultured in LB broth with agitation at 37 °C overnight to amplify the number of plasmids. Finally, plasmids were purified by a HiSpeed Plasmid Midi Kit (QIAGEN) according to the manufacturer's recommendation.

Cell culture medium was refreshed with addition of 2  $\mu\text{M}$  *all-trans-retinal* (Sigma-Aldrich) 12~24 hours after cell seeding when cell culture reaches 60-70% confluency. Cells were then transfected by adding 40  $\mu\text{L}$  1 X OPTI-MEM (ThermoFisher) solution mixed with 200 ng of each plasmid (either with single plasmids or one pair of plasmids for co-transfection) and 0.5  $\mu\text{L}$  Lipofectamine LTX reagent (ThermoFisher) to each well of the 48-well plate.

### 4. Ca<sup>2+</sup> imaging under optogenetic stimulus.

Ca<sup>2+</sup> imaging of HEK 293 cells under optogenetic stimulus was performed 24~48 hours after transfection, with an imaging solution containing 80 mM CaCl<sub>2</sub>, 20 mM glucose, 23 mM NMDG, 5 mM NaCl, 3 mM KCl, 1 mM MgCl<sub>2</sub>, and 10 mM HEPES (pH 7.3). Cell experiments were conducted using an epifluorescence upright microscope (FN1, Nikon) equipped with a Zyla4.2 plus sCMOS (scientific complementary metal-oxide semiconductor) camera (Andor, USB 3.0) and a SPECTRA X light engine (Lumencor). Cells were

imaged with a CFI60 Fluor 20× water immersion objective lens (NA = 0.5, Nikon) at room temperature. Specifically, we applied: (1) a 6.2 mW 575/25 nm excitation light, a 585 nm long-pass dichroic mirror, and a 632/60 nm emission filter to image *ChR2-jRCaMP1a* co-expressed and *jRCaMP1a* control cells; (2) a 23.1 mW 640/30 nm excitation light, a 660 nm long-pass dichroic mirror, and a 665 nm long pass emission filter to image *ChR2-NIR-GECO1* co-expressed and *NIR-GECO1* control cells; (3) a 3.92 mW 470/24 nm excitation light, a 495 nm long-pass dichroic mirror, and a 520/40 nm emission filter to examine the *ChR2* expression by EYFP imaging. Optogenetic stimulus was offered by either micro-LEDs or a 3.92 mW 470/24 nm light from the SPECTRA X light engine. Fluorescence was sampled at 0.5 frame per second (100 ms exposure time per frame, no binning). The micro-LED array was current biased using a B2902A source-measurement unit (Keysight), which was triggered by FN1 to synchronize with the camera. The microscope-based stimulus was synchronized with the camera using Nikon-Elements Advanced Research software (Nikon).

## 5. Device characterization.

LED pixels were biased at  $I_{LED} = 0.1 - 2 \mu A$  at a step of  $0.1 \mu A$  by Keysight B2902A, with a  $400 k\Omega$  series resistor ( $R_s$ ) applied to protect the array damage due to improper voltage levels. Accordingly, the  $V_{LED}$  values in measured  $I-V$  curves were corrected by subtracting the voltage drop across  $R_s$ . During the pulsing test, the select pixel was pulsed at  $I_{LED} = 2 \mu A$  with a 10 ms-duration;  $I_{light}$  of the select pixel was recorded by FN1 for one second (1 ms exposure time per frame, no binning or filter cube was applied).

Optical power of micro-LEDs was measured by a digital optical power and energy meter console (PM100D, Thorlabs) connected with a photodiode power sensor (s120C, Thorlabs). The wavelength correction of the power meter was set to 462 nm to match the dominant photoluminescence wavelength of as-made micro-LEDs. Spatial profile of the output light was also captured by FN1 with 1 ms exposure time per frame (no binning or filter cube was applied).

## 6. Statistical significance.

Statistical analysis in Figs. 3, 4, S6, and S7 was based on Student's  $t$ -test (two-tailed, independent two-sample  $t$ -test).
